# Supplementary material for: Efficient circularly polarized luminescence from zero-dimensional terbium- and europium-based hybrid metal halides
Source: Royal Society of Chemistry journal article supplement (doi:10.1039/d4cc05206d), 2024-11-28
Supplement: d4cc05206d1.pdf [file d4cc05206d1.pdf]

## **Efficient Circularly Polarized Luminescence from Zero-Dimensional Terbium- and Europium-Based Hybrid Metal Halides**

Yan Zhang,<sup>a</sup> Yi Wei,<sup>\*a</sup> Chen Li,<sup>a</sup> Yuxuan Wang,<sup>a</sup> Yulian Liu,<sup>a</sup> Meiyong He,<sup>a</sup> Zhishan Luo,<sup>a</sup> Xiaoyong Chang,<sup>a</sup> Xiaojun Kuang<sup>b</sup> and Zewei Quan<sup>\*a</sup>

a. Department of Chemistry, Southern University of Science and Technology (SUSTech),  
Shenzhen, Guangdong, 518055, China.

b. College of Materials Science and Engineering, Guilin University of Technology, Guilin  
541004, China

\* Corresponding author

Keywords: zero-dimensional hybrid metal halides, rare-earth-based luminescent materials,  
circularly polarized luminescence, circularly polarized light-emitting diodes

E-mail: [quanzw@sustech.edu.cn](mailto:quanzw@sustech.edu.cn)

[weiy3@sustech.edu.cn](mailto:weiy3@sustech.edu.cn)

### Experimental procedures:

**Materials.** Terbium (III) chloride hexahydrate ( $\text{TbCl}_3 \cdot 6\text{H}_2\text{O}$ , 99.0%) was purchased from Leyan. Europium (III) chloride hexahydrate ( $\text{EuCl}_3 \cdot 6\text{H}_2\text{O}$ , 99.99%) was purchased from Aladdin Reagent Co. Ltd (Shanghai, China). (*S*)-3-Methylmorpholine (*S*-MOR, 97%) and (*R*)-3-Methylmorpholine (*R*-MOR, 98%) were purchased from BIDE. Hydrochloric acid (HCl, 36%-38wt. % in  $\text{H}_2\text{O}$ ) was purchased from YongHua. All chemicals were used without any further purification.

**Synthesis of *S/R*-TbCl and *S/R*-EuCl enantiomers:** *S/R*-MOR (3 mmol) and  $\text{TbCl}_3 \cdot 6\text{H}_2\text{O}$  (1 mmol) were mixed in a 20 mL glass vial. Then, 10 mL of HCl was added to the mixture. The solution was stirred at 110°C for 20 minutes, during which time the solution gradually became clarified. After obtaining a clear solution, the solvent was evaporated at 110°C. Colorless and transparent crystals of *S/R*-TbCl were formed upon evaporation.

The *S/R*-EuCl enantiomers were prepared using the same procedure, replacing  $\text{TbCl}_3 \cdot 6\text{H}_2\text{O}$  with  $\text{EuCl}_3 \cdot 6\text{H}_2\text{O}$  (1 mmol).

### Synthesis of CP-LEDs based on *S/R*-TbCl and *S/R*-EuCl:

The luminescent layers were prepared by mixing the powder of *S/R*-TbCl and *S/R*-EuCl with a mixture of polydimethylsiloxane (1 ml) and methyltriethoxysilane (0.1 ml), respectively. Considering the difference in excitation wavelengths between *S/R*-TbCl and *S/R*-EuCl, the luminescent layers made from these two materials were coated onto commercial 275 nm and 395 nm chips, respectively, to fabricate the LED devices (*S/R*-Tb-LED and *S/R*-Eu-LED). The entire procedure was conducted inside a glove box to prevent performance degradation caused by moisture absorption. The LEDs were then placed in an oven for curing, maintaining a constant temperature of 80°C for approximately 12 hours. Once curing was completed, the devices were ready for testing.

### Characterizations:

**Single crystal X-ray diffraction (SCXRD)** was conducted using a Bruker D8 Venture X-ray single crystal diffractometer. Data were collected with Mo-K $\alpha$  radiation ( $\lambda = 0.71073 \text{ \AA}$ ) at 100 K. Data reduction, scaling, and absorption corrections were performed using SAINT (Bruker, V8.38A, 2013), and the structures were solved and determined with Olex2 software.<sup>1-2</sup> The crystal structures were refined using ver. 2016/6 of ShelXL (Sheldrick, 2008) and visualized with VESTA<sup>3-4</sup>.

**Powder X-ray Diffraction (PXRD) patterns** were collected on an X-ray diffractometer (Rigaku Smart Lab) with Cu K $\alpha$  radiation ( $\lambda = 0.15418 \text{ nm}$ ) at a voltage of 45 kV and a current of 200 mA. The diffraction patterns were recorded over a range of 5° to 45° at room temperature to confirm the purity. Standard XRD patterns were exported using the Mercury 3.8 program.

**Photoluminescence (PL) and Photoluminescence excitation (PLE) spectra** were recorded using an Edinburgh Instrument FLS1000 spectrometer equipped with a xenon lamp (450 W) at room temperature. Temperature-independent PL spectra were obtained with a FLS1000 fluorescence spectrometer fitted with a cryogenic attachment. PL lifetime measurements were conducted using a microsecond flashlamp on the FLS1000 fluorescence spectrometer. Photoluminescence quantum yields (PLQYs) were measured directly using the FLS1000 spectrometer with an integrated sphere. X-ray photoelectron spectroscopy (XPS) data were acquired with an ULVAC PHI 5000 VersaProbe III spectrometer, utilizing the Al K $\alpha$  (1489.6 eV) line as the excitation source. Data were analyzed using MultiPak software.

**UV-Vis absorption spectra** were measured on a UV-3600i Plus spectrophotometer with BaSO<sub>4</sub> as the standard.

**Transmission Circular Dichroism (CD) spectra** were collected with a CD spectrometer (J810, JASCO) using “Standard” sensitivity (100 mdeg) at a scanning speed of 50 nm/min.

**Circularly Polarized Luminescence (CPL) spectra** were recorded using a JASCO CPL-300 instrument. The samples were dissolved in DMF, dropped onto quartz slides, and dried at 80°C to form uniform thin films. CPL spectra were scanned at a speed of 100 nm/min with two accumulations. The emission bandwidths were 5 nm for *S/R*-TbCl and 8 nm for *S/R*-EuCl.

Table S1. Single crystal X-ray diffraction data of *S/R-TbCl*.

| Empirical formula                           | C <sub>30</sub> H <sub>72</sub> Cl <sub>12</sub> O <sub>6</sub> N <sub>6</sub> Tb <sub>2</sub><br>/ <i>S-TbCl</i> | C <sub>30</sub> H <sub>72</sub> Cl <sub>12</sub> O <sub>6</sub> N <sub>6</sub> Tb <sub>2</sub><br>/ <i>R-TbCl</i> |
|---------------------------------------------|-------------------------------------------------------------------------------------------------------------------|-------------------------------------------------------------------------------------------------------------------|
| Formula weight                              | 1356.17                                                                                                           | 1356.17                                                                                                           |
| Temperature/K                               | 100.00                                                                                                            | 100.00                                                                                                            |
| Crystal system                              | Monoclinic                                                                                                        | Monoclinic                                                                                                        |
| Space group                                 | <i>P2<sub>1</sub></i>                                                                                             | <i>P2<sub>1</sub></i>                                                                                             |
| a/Å                                         | 13.2356(17)                                                                                                       | 13.2751(7)                                                                                                        |
| b/Å                                         | 11.9576(15)                                                                                                       | 11.9418(7)                                                                                                        |
| c/Å                                         | 16.874(2)                                                                                                         | 16.8205(10)                                                                                                       |
| α/°                                         | 90                                                                                                                | 90                                                                                                                |
| β/°                                         | 98.179(4)                                                                                                         | 97.982(2)                                                                                                         |
| γ/°                                         | 90                                                                                                                | 90                                                                                                                |
| Volume/Å <sup>3</sup>                       | 2643.4(6)                                                                                                         | 2640.7(3)                                                                                                         |
| Z                                           | 2                                                                                                                 | 2                                                                                                                 |
| ρ <sub>calc</sub> g/cm <sup>3</sup>         | 1.704                                                                                                             | 1.706                                                                                                             |
| μ/mm <sup>-1</sup>                          | 3.302                                                                                                             | 3.305                                                                                                             |
| F(000)                                      | 1352.0                                                                                                            | 1352.0                                                                                                            |
| Radiation                                   | MoKα (λ = 0.71073)                                                                                                | MoKα (λ = 0.71073)                                                                                                |
| 2θ range for data collection/°              | 3.668 to 50.696                                                                                                   | 3.098 to 55.09                                                                                                    |
| Index ranges                                | -15 ≤ h ≤ 15<br>-14 ≤ k ≤ 14<br>-20 ≤ l ≤ 20                                                                      | -17 ≤ h ≤ 17<br>-15 ≤ k ≤ 15<br>-21 ≤ l ≤ 21                                                                      |
| Reflections collected                       | 36291                                                                                                             | 73907                                                                                                             |
| Independent reflections                     | 9643 [R <sub>int</sub> = 0.0637, R <sub>sigma</sub> = 0.0596]                                                     | 12139 [R <sub>int</sub> = 0.0557, R <sub>sigma</sub> = 0.0415]                                                    |
| Data/restraints/parameters                  | 9643/226/590                                                                                                      | 12139/451/574                                                                                                     |
| Goodness-of-fit on F <sup>2</sup>           | 1.048                                                                                                             | 1.053                                                                                                             |
| Final R indexes [I ≥ 2σ (I)]                | R <sub>1</sub> = 0.0735, wR <sub>2</sub> = 0.1879                                                                 | R <sub>1</sub> = 0.0476, wR <sub>2</sub> = 0.0908                                                                 |
| Final R indexes [all data]                  | R <sub>1</sub> = 0.0895, wR <sub>2</sub> = 0.2028                                                                 | R <sub>1</sub> = 0.0663 wR <sub>2</sub> = 0.1017                                                                  |
| Largest diff. peak/hole / e Å <sup>-3</sup> | 1.91/-1.51                                                                                                        | 2.16/-1.71                                                                                                        |
| Flack parameter                             | 0.00(3)                                                                                                           | 0.015(6)                                                                                                          |
| CCDC                                        | <b>2364010</b>                                                                                                    | <b>2364011</b>                                                                                                    |

$$R_1 = \frac{\sum ||Fo| - |Fc||}{\sum |Fo|}, wR_2 = \left[ \frac{\sum w(Fo^2 - Fc^2)^2}{\sum w(Fo^2)^2} \right]^{1/2}$$

Table S2. Single crystal X-ray diffraction data of *S/R*-EuCl.

| Empirical formula                           | C <sub>30</sub> H <sub>72</sub> Cl <sub>12</sub> O <sub>6</sub> N <sub>6</sub> Eu <sub>2</sub><br>/ <i>S</i> -EuCl | C <sub>30</sub> H <sub>72</sub> Cl <sub>12</sub> O <sub>6</sub> N <sub>6</sub> Eu <sub>2</sub><br>/ <i>R</i> -EuCl |
|---------------------------------------------|--------------------------------------------------------------------------------------------------------------------|--------------------------------------------------------------------------------------------------------------------|
| Formula weight                              | 1342.25                                                                                                            | 1342.25                                                                                                            |
| Temperature/K                               | 100.00                                                                                                             | 100.00                                                                                                             |
| Crystal system                              | Monoclinic                                                                                                         | Monoclinic                                                                                                         |
| Space group                                 | <i>P2</i> <sub>1</sub>                                                                                             | <i>P2</i> <sub>1</sub>                                                                                             |
| a/Å                                         | 13.3233(6)                                                                                                         | 13.3330(5)                                                                                                         |
| b/Å                                         | 11.9727(6)                                                                                                         | 11.9679(4)                                                                                                         |
| c/Å                                         | 16.8005(8)                                                                                                         | 16.8004(6)                                                                                                         |
| α/°                                         | 90                                                                                                                 | 90                                                                                                                 |
| β/°                                         | 97.753(2)                                                                                                          | 97.7990(10)                                                                                                        |
| γ/°                                         | 90                                                                                                                 | 90                                                                                                                 |
| Volume/Å <sup>3</sup>                       | 2655.4(2)                                                                                                          | 2656.01(16)                                                                                                        |
| Z                                           | 2                                                                                                                  | 2                                                                                                                  |
| ρ <sub>calc</sub> g/cm <sup>3</sup>         | 1.679                                                                                                              | 1.678                                                                                                              |
| μ/mm <sup>-1</sup>                          | 2.985                                                                                                              | 2.985                                                                                                              |
| F(000)                                      | 1344.0                                                                                                             | 1344.0                                                                                                             |
| Radiation                                   | MoKα (λ = 0.71073)                                                                                                 | MoKα (λ = 0.71073)                                                                                                 |
| 2θ range for data collection/°              | 3.67 to 55.022                                                                                                     | 3.666 to 54.994                                                                                                    |
| Index ranges                                | -17 ≤ h ≤ 17<br>-15 ≤ k ≤ 15<br>-21 ≤ l ≤ 21                                                                       | -17 ≤ h ≤ 17<br>-15 ≤ k ≤ 15<br>-21 ≤ l ≤ 21                                                                       |
| Reflections collected                       | 63859                                                                                                              | 74209                                                                                                              |
| Independent reflections                     | 12198 [R <sub>int</sub> = 0.0679, R <sub>sigma</sub> = 0.0575]                                                     | 12185 [R <sub>int</sub> = 0.0613, R <sub>sigma</sub> = 0.0451]                                                     |
| Data/restraints/parameters                  | 12198/415/603                                                                                                      | 12185/285/604                                                                                                      |
| Goodness-of-fit on F <sup>2</sup>           | 1.049                                                                                                              | 1.044                                                                                                              |
| Final R indexes [I ≥ 2σ (I)]                | R <sub>1</sub> = 0.0474, wR <sub>2</sub> = 0.0783                                                                  | R <sub>1</sub> = 0.0446, wR <sub>2</sub> = 0.0809                                                                  |
| Final R indexes [all data]                  | R <sub>1</sub> = 0.0734, wR <sub>2</sub> = 0.0881                                                                  | R <sub>1</sub> = 0.0608 wR <sub>2</sub> = 0.0885                                                                   |
| Largest diff. peak/hole / e Å <sup>-3</sup> | 1.12/-1.23                                                                                                         | 2.35/-1.16                                                                                                         |
| Flack parameter                             | 0.015(8)                                                                                                           | 0.03(2)                                                                                                            |
| CCDC                                        | 2364012                                                                                                            | 2364013                                                                                                            |

$$R_1 = \frac{\sum ||Fo| - |Fc||}{\sum |Fo|}, wR_2 = \left[ \frac{\sum w(Fo^2 - Fc^2)^2}{\sum w(Fo^2)^2} \right]^{1/2}$$

Table S3. Summary of Tb/Eu based luminescent materials.

| <b>Tb/Eu-based materials</b>                                         | <b>Lifetime</b> | <b>PLQY</b>         | <b> g<sub>lum</sub> </b> | <b>CIE</b>          | <b>Reference</b> |
|----------------------------------------------------------------------|-----------------|---------------------|--------------------------|---------------------|------------------|
| Cs <sub>3</sub> TbCl <sub>6</sub>                                    | 5.53ms          | 36.85%              | -                        | (0.30, 0.66)        | 5                |
| <i>m</i> CB-Tb                                                       | 0.85ms          | 49.80%              | -                        | (0.32, 0.58)        | 6                |
| [TbR(+)BnMeH <sub>22</sub> IAM]                                      | 1.39ms          | 63.00%              | 0.044                    | -                   | 7                |
| [(R)-iPr-Pybox] <sub>8</sub> (TbIII) <sub>8</sub> (THP) <sub>8</sub> | 5.40μs          | 0.13%               | 0.25                     | -                   | 8                |
| L/D-Phe-Tb⊃UCNPs                                                     | 0.11ms          | 6.48%               | 0.0029                   | (0.32, 0.55)        | 9                |
| <b><i>S/R</i>-TbCl</b>                                               | <b>4.62ms</b>   | <b>(85.1-91.2)%</b> | <b>0.006</b>             | <b>(0.33, 0.62)</b> | <b>this work</b> |
| Cs <sub>3</sub> EuCl <sub>6</sub>                                    | 3.99ms          | 48.78%              | -                        | (0.56, 0.33)        | 5                |
| <i>m</i> CB-Eu                                                       | 0.74ms          | 20.50%              | -                        | (0.62, 0.38)        | 6                |
| [EuR(+)BnMeH <sub>22</sub> IAM]                                      | 0.88ms          | 2.30%               | 0.298                    | -                   | 7                |
| [(R)-iPr-Pybox] <sub>8</sub> (EuIII) <sub>8</sub> (THP) <sub>8</sub> | 0.86ms          | 14.50%              | 1.25                     | -                   | 8                |
| TEA <sup>+</sup> [Eu(+tfc) <sub>4</sub> ] <sup>-</sup>               | 0.371ms         | 17%                 | 1.54                     | -                   | 10               |
| <b><i>S/R</i>-EuCl</b>                                               | <b>2.27ms</b>   | <b>(48.5-52.0)%</b> | <b>0.009</b>             | <b>(0.64, 0.35)</b> | <b>this work</b> |

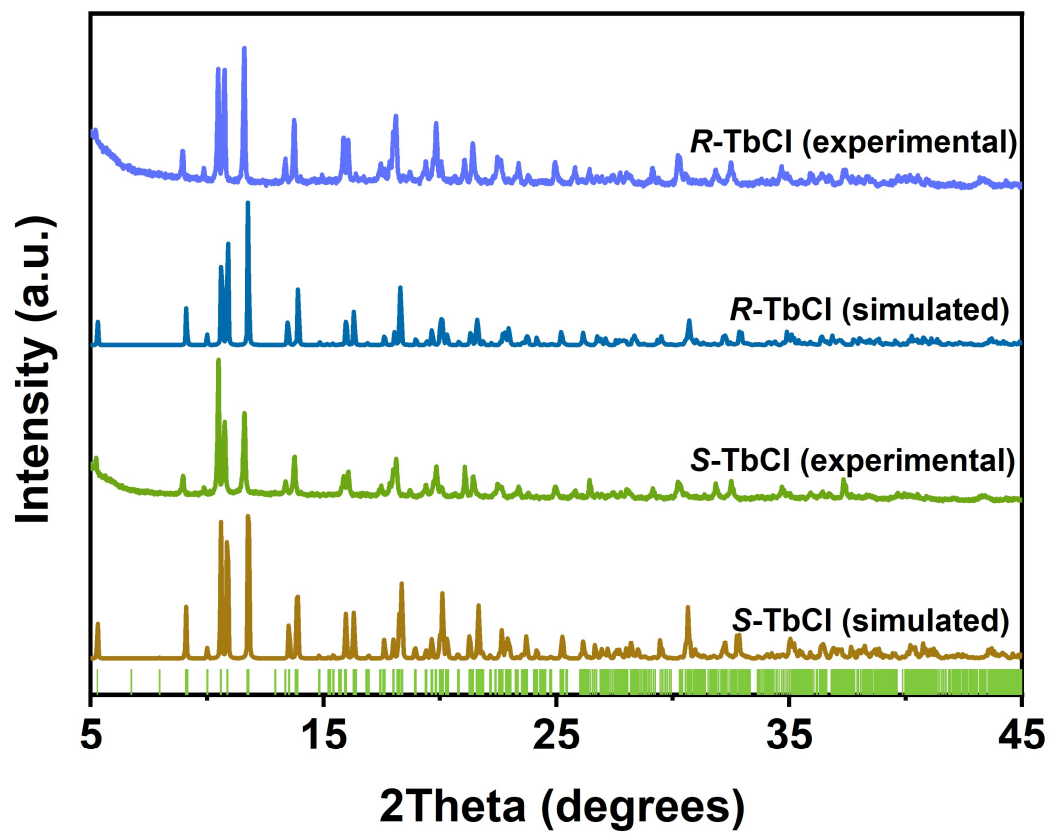

Fig. S1. PXRD patterns of *S/R*-TbCl with simulated and experimental curves.

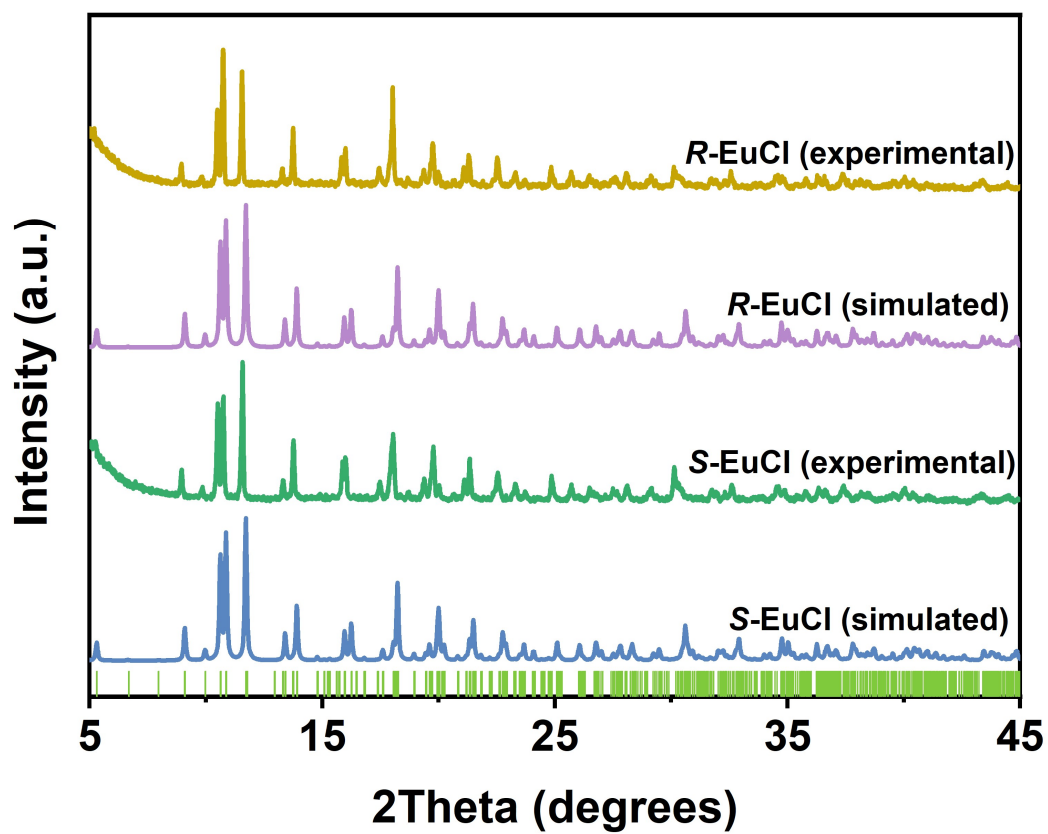

Fig. S2. PXRD patterns of *S/R*-EuCl with simulated and experimental curves.



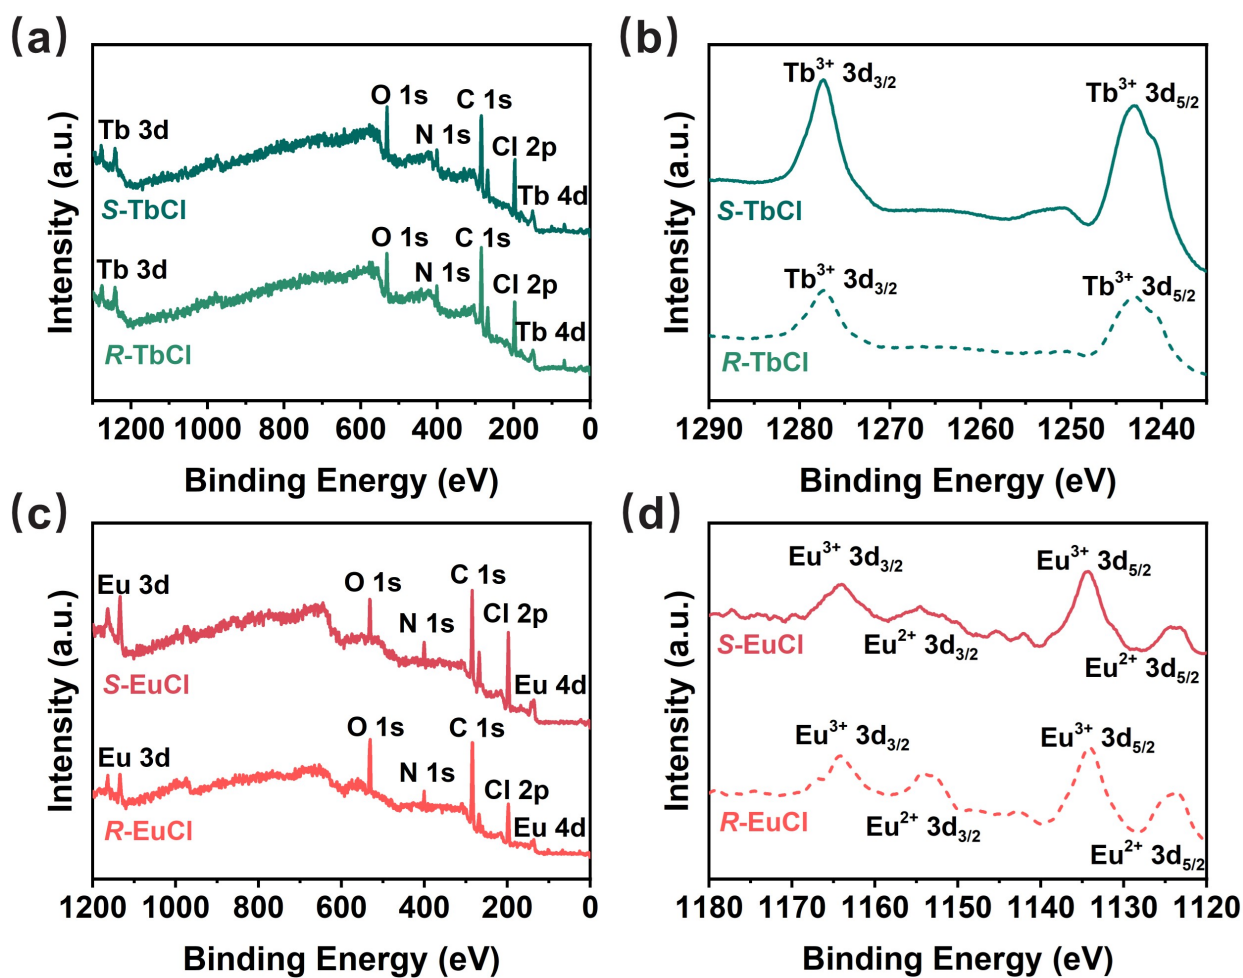

**Fig. S3.** (a) XPS survey spectra of *S*/*R*-TbCl. (b) High-resolution XPS spectra of Tb 3d. (c) XPS survey spectra of *S*/*R*-EuCl. (d) High-resolution XPS spectra of Eu 3d.

The binding energies of 1153.9 and 1123.9 eV correspond to 3d<sub>3/2</sub> and 3d<sub>5/2</sub> of Eu<sup>2+</sup>, which may be attributed to the partial reduction during the XPS testing.<sup>11</sup>

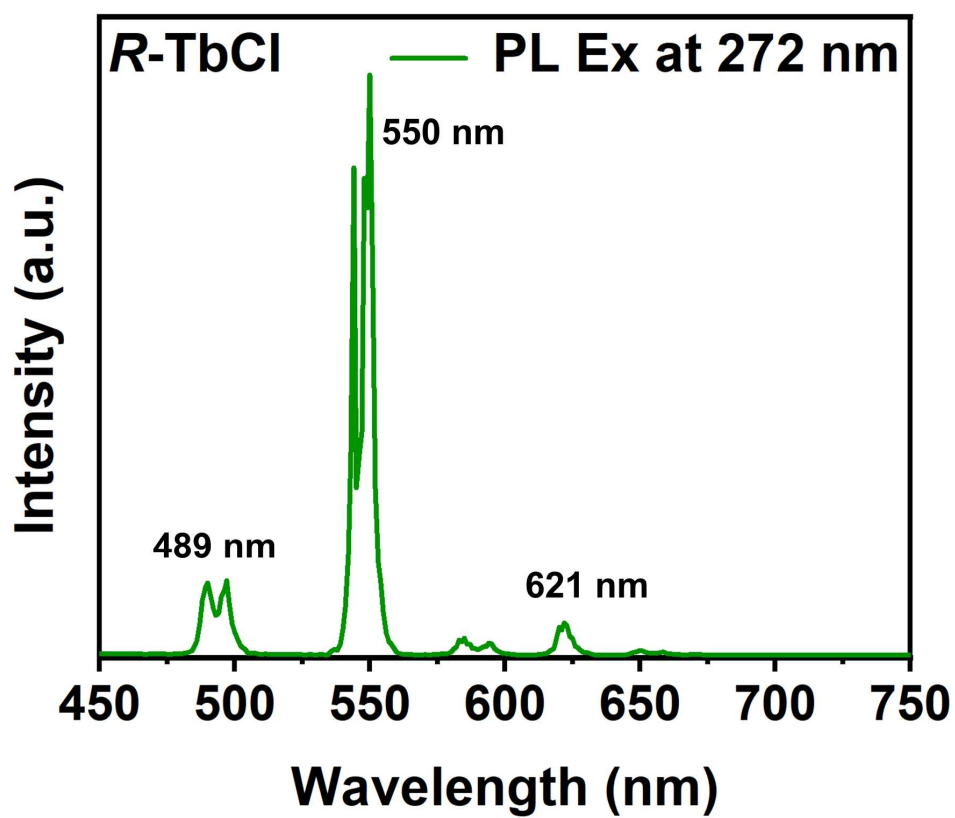

Fig. S4. PL spectrum of *R*-TbCl.

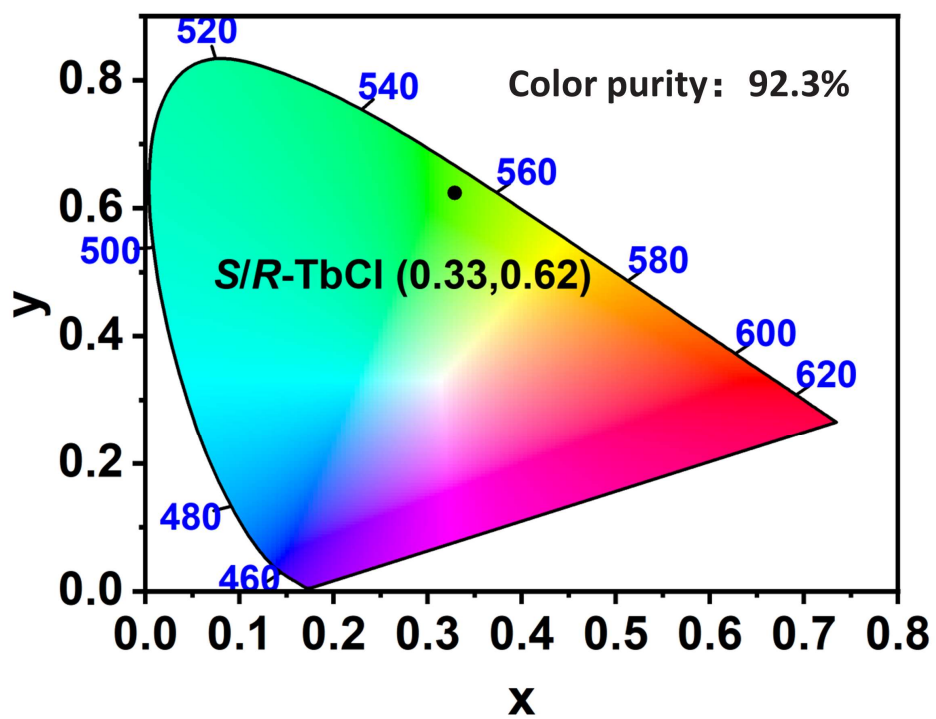

Fig. S5. CIE coordinates of *S/R-TbCl*.

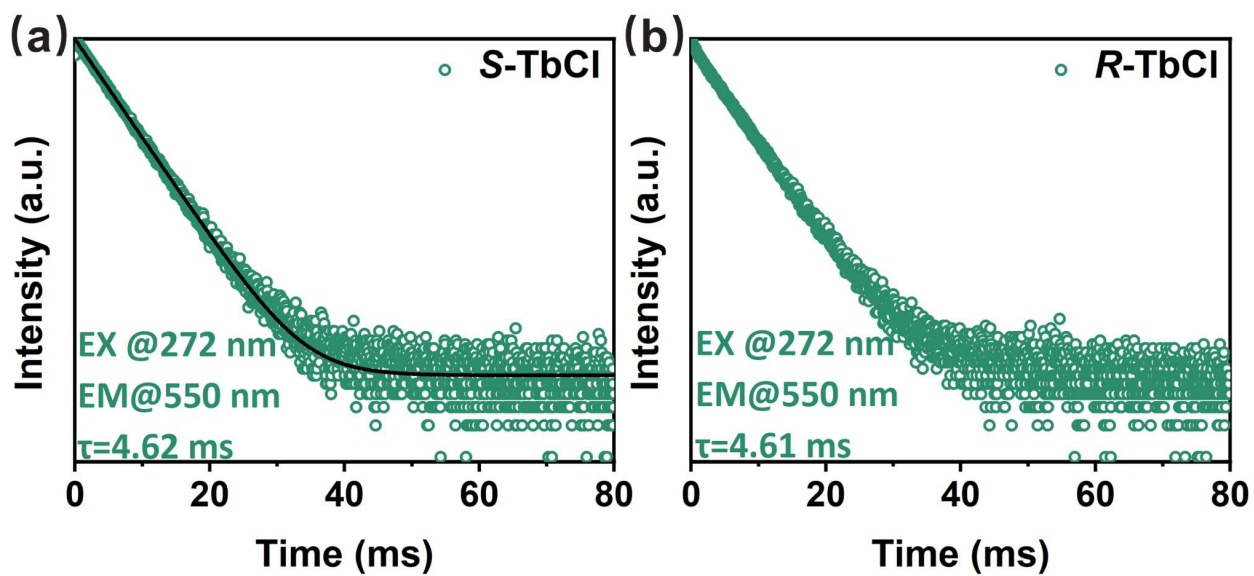

Fig. S6. PL decay curves of *S*-TbCl (a) and *R*-TbCl (b) under 272 nm excitation.

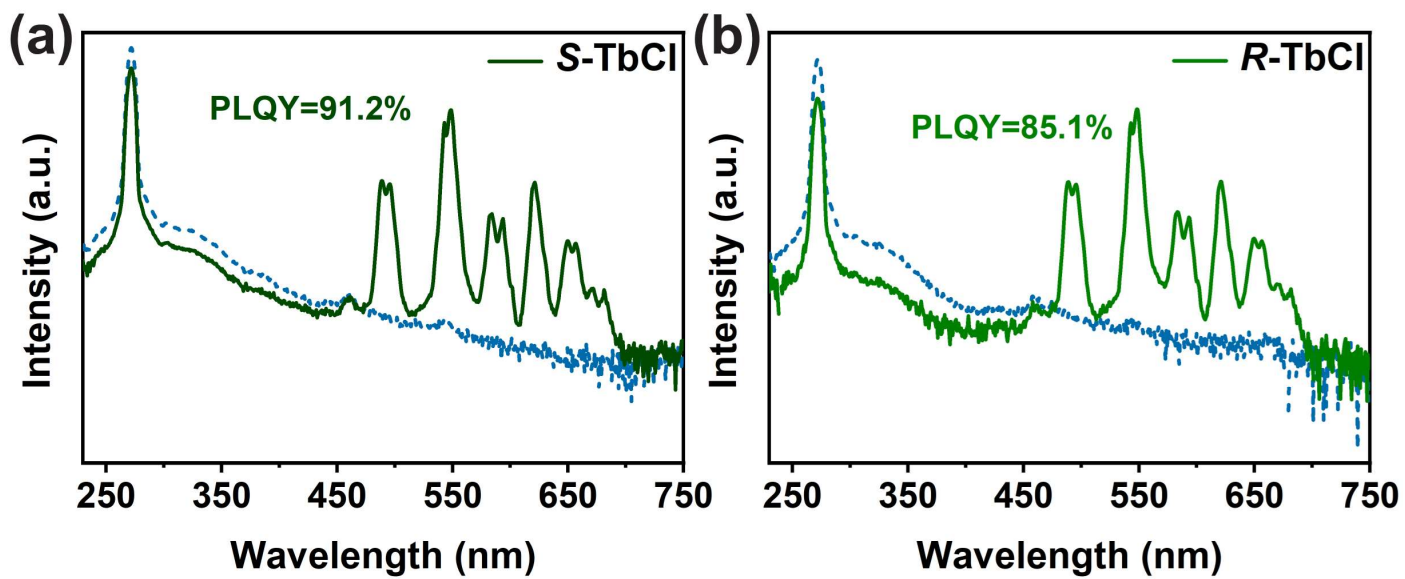

Fig. S7. PLQYs measurements of *S*-TbCl (a) and *R*-TbCl (b) at room temperature.

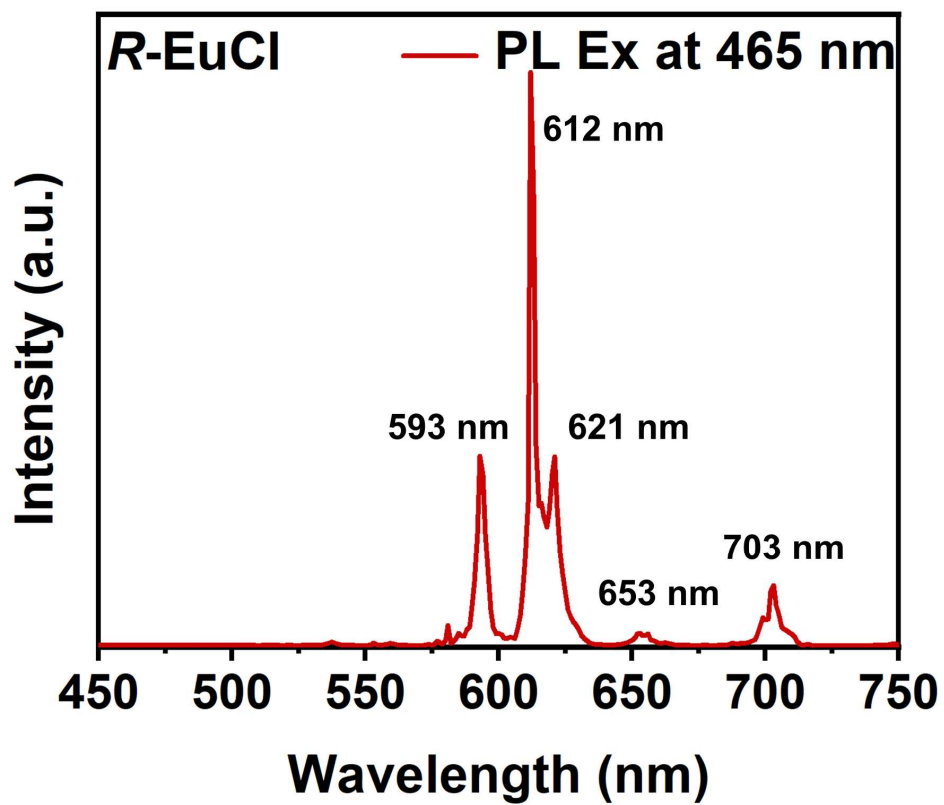

Fig. S8. PL spectrum of *R*-EuCl.

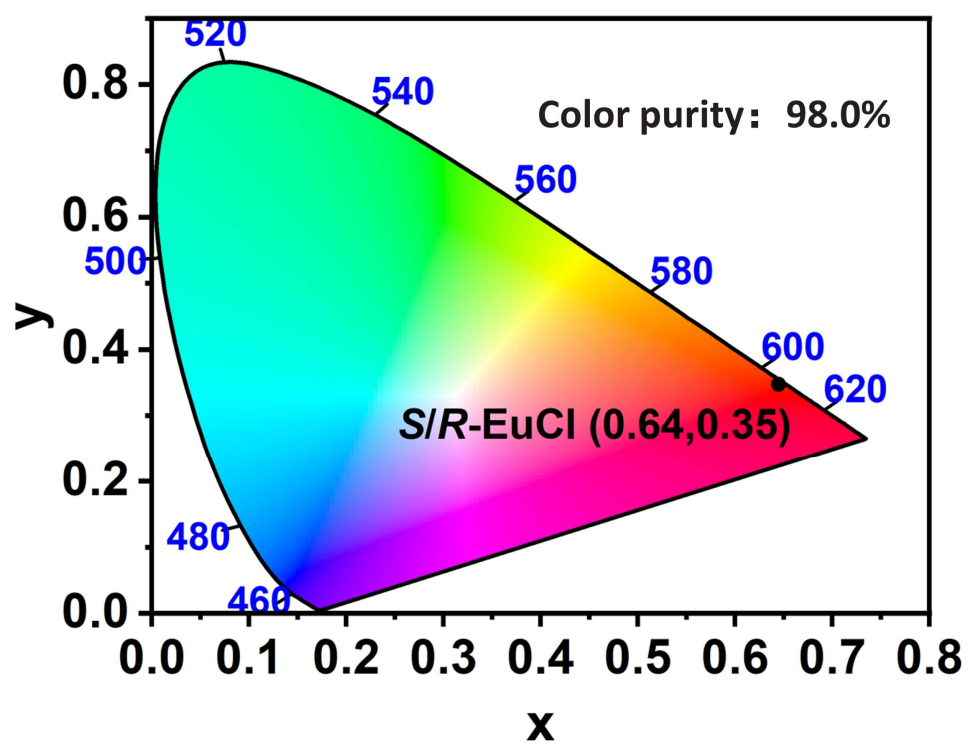

Fig. S9. CIE coordinates of *S/R*-EuCl.

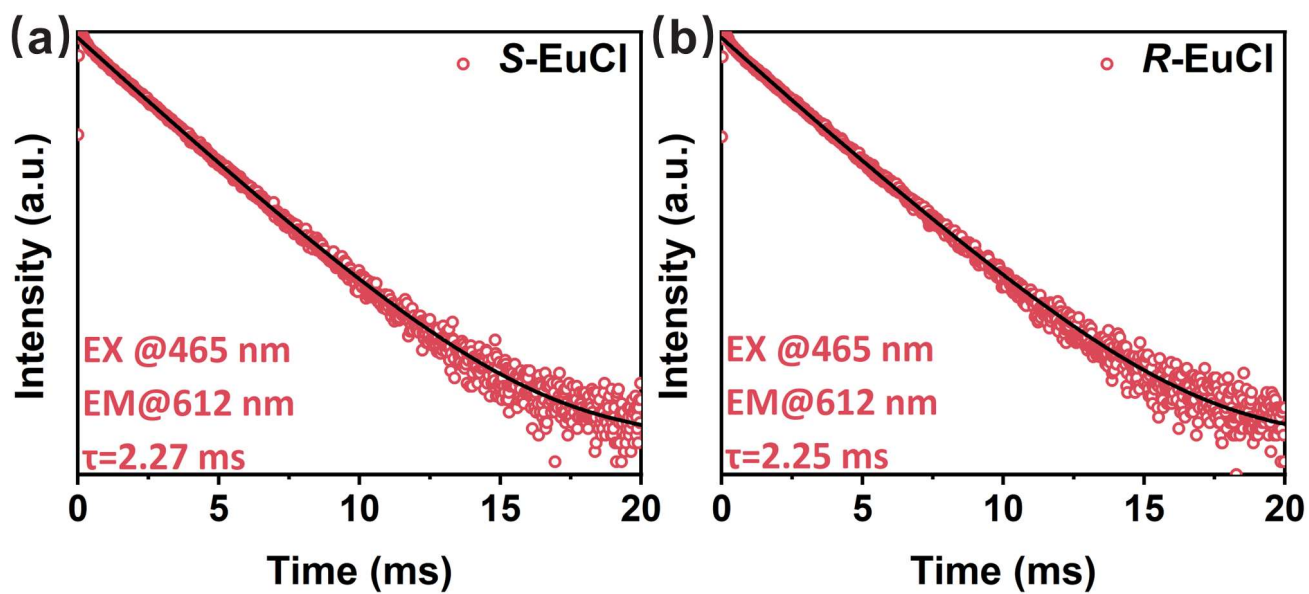

Fig. S10. PL decay curves of *S*-EuCl (a) and *R*-EuCl (b) under 465 nm excitation.



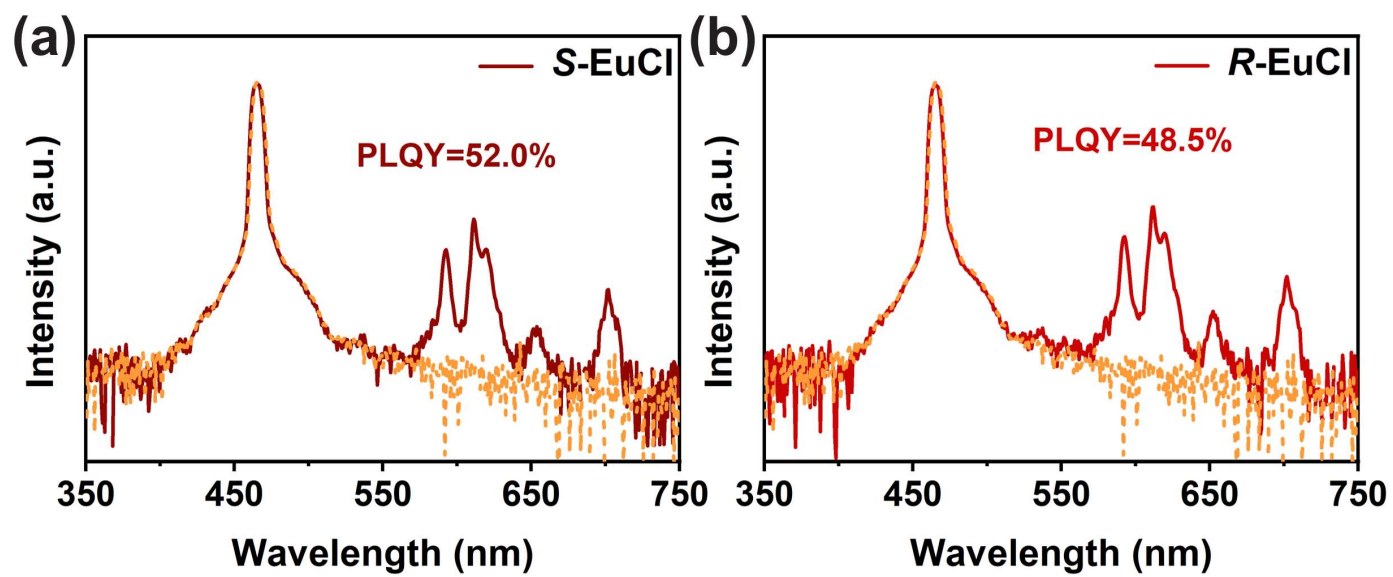

Fig. S11. PLQY measurements of *S*-EuCl (a) and *R*-EuCl (b) at room temperature.

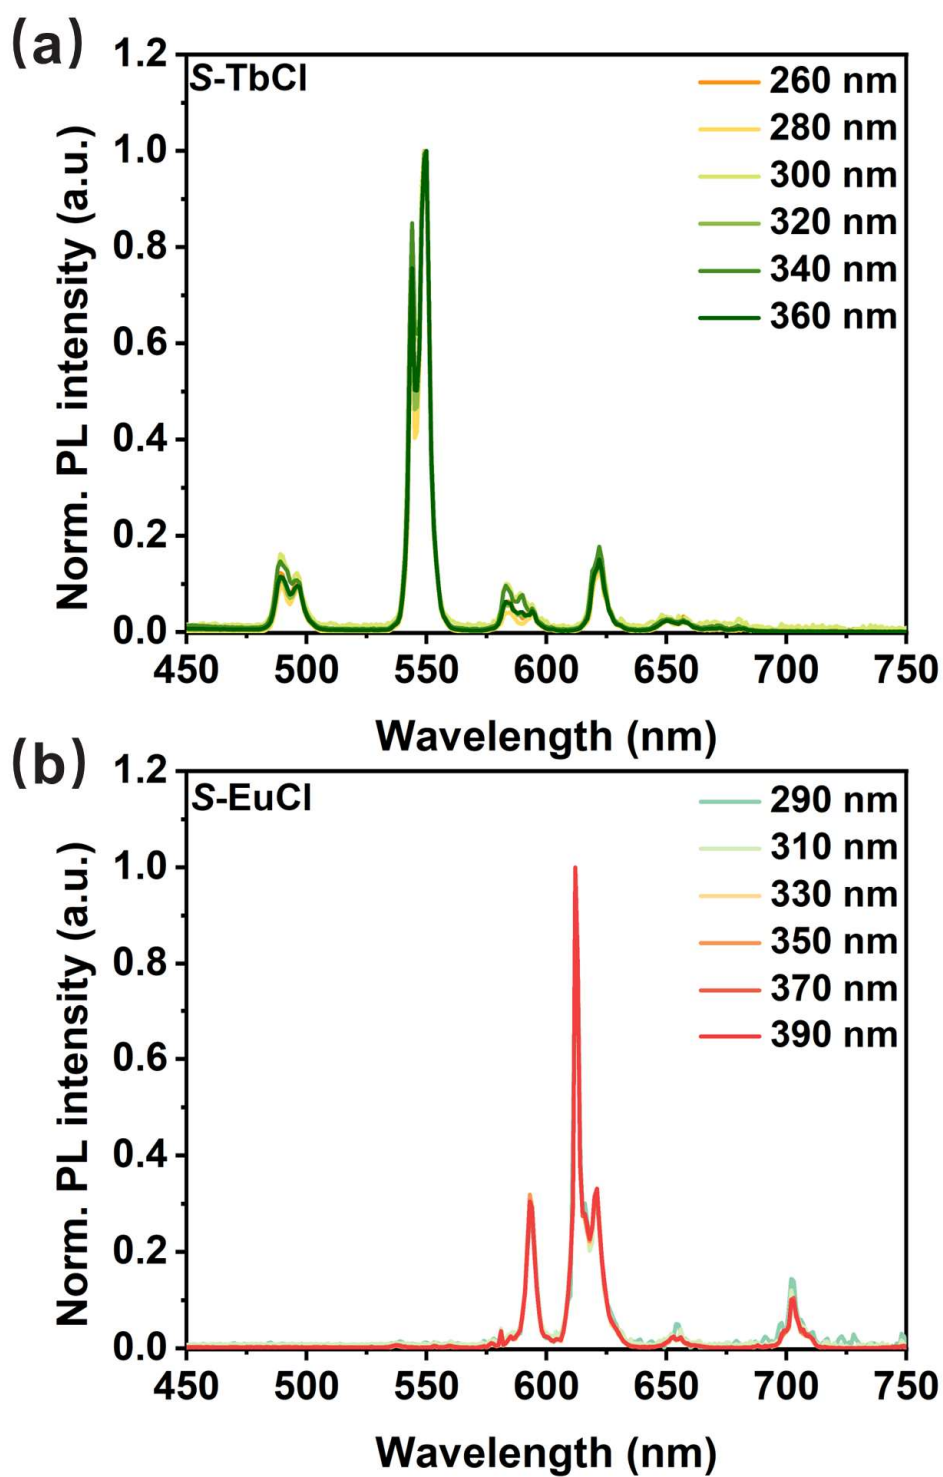

**Fig. S12.** Normalized PL spectra of *S*-TbCl (a) and *S*-EuCl (b) under different excitation wavelengths.

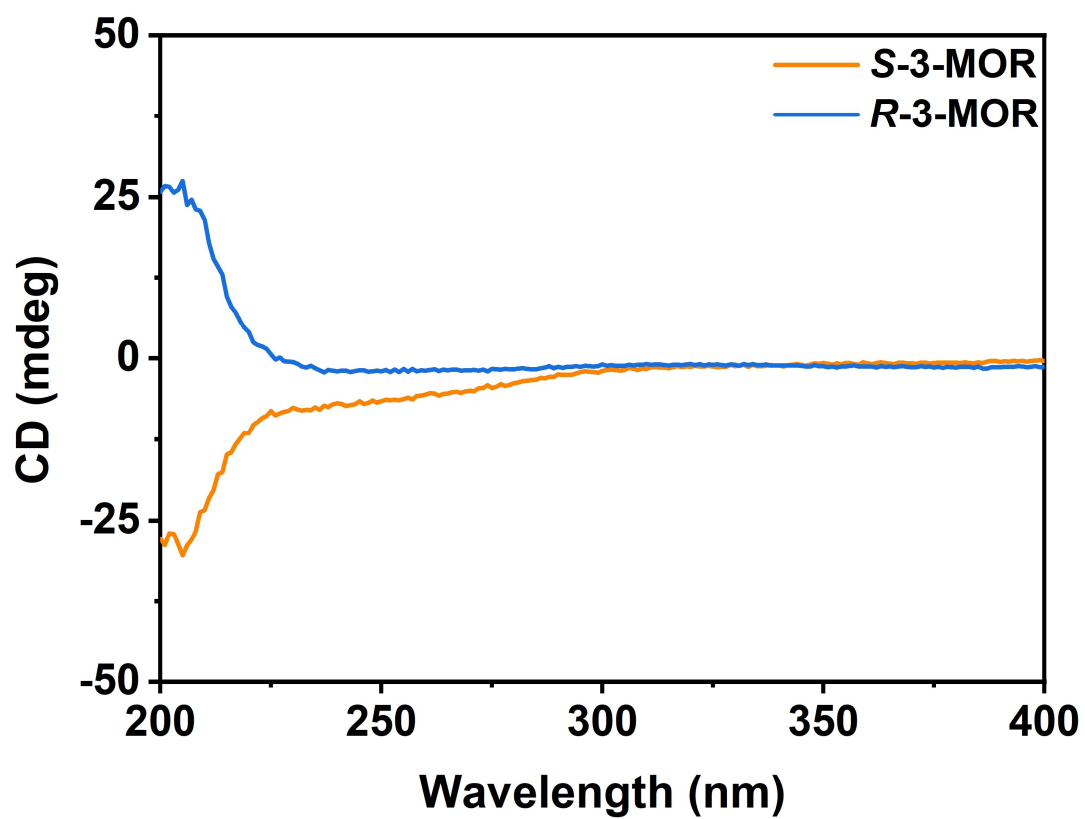

Fig. S13. CD spectra of *S*-3MOR and *R*-3MOR.

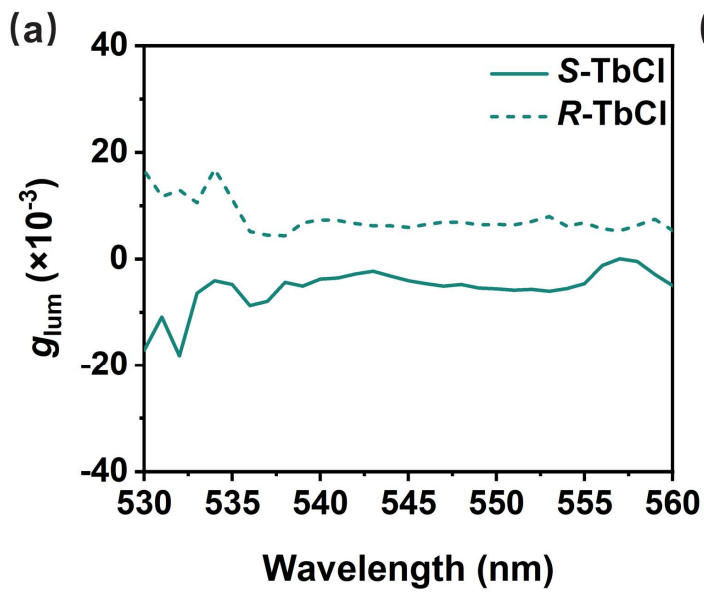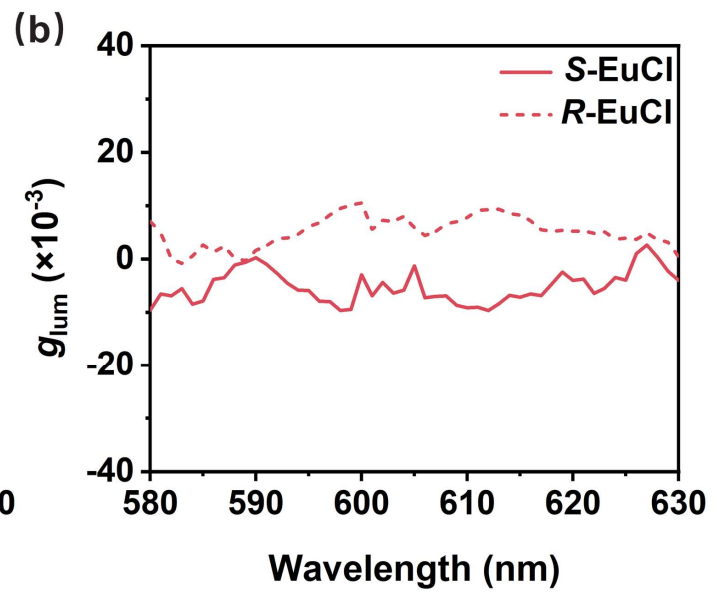

Fig. S14.  $g_{lum}$  of *S/R*-TbCl (a) and *S/R*-EuCl (b).

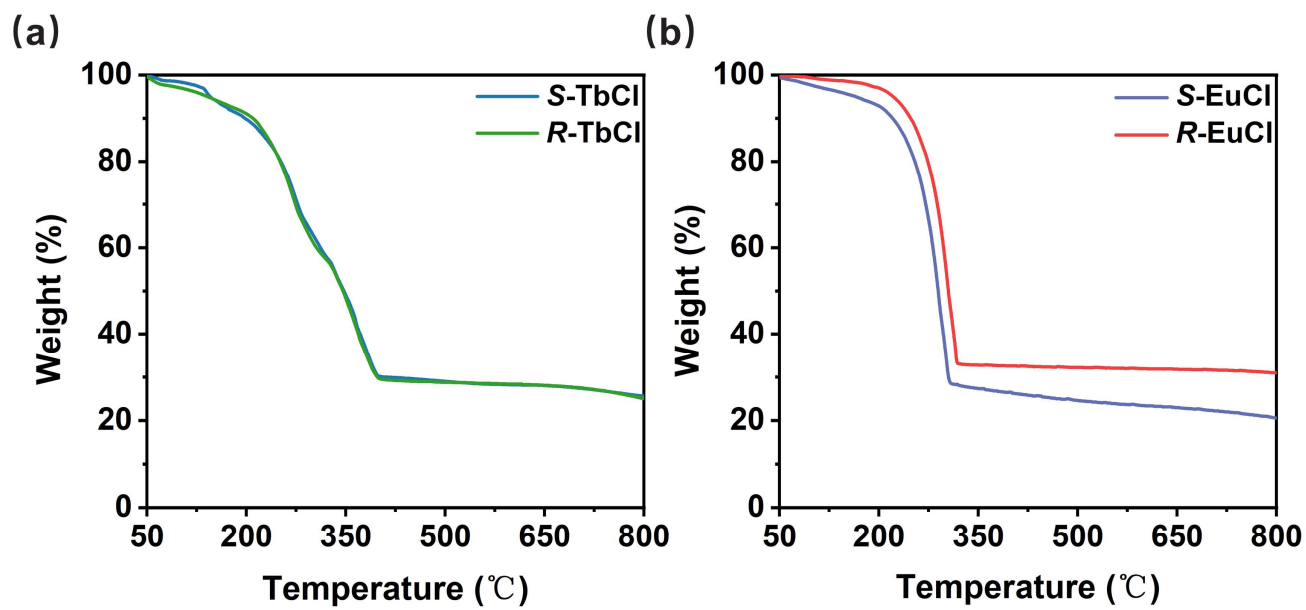

Fig. S15. TGA curves of *S/R*-TbCl (a) and *S/R*-EuCl (b) from 50 °C to 800 °C.

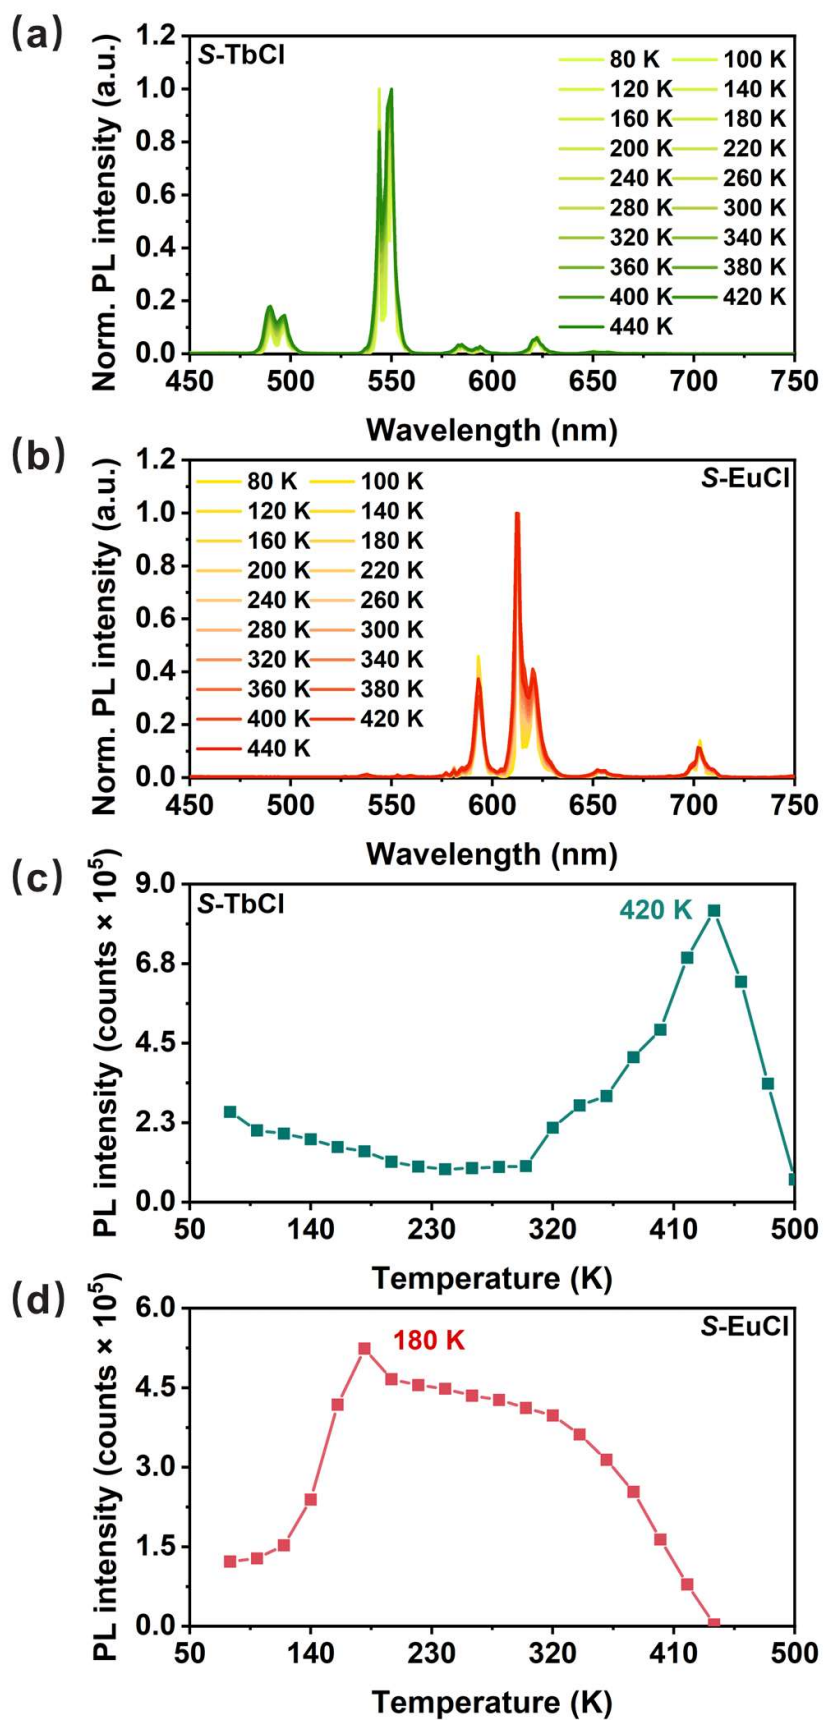

**Fig. S16.** Normalized PL spectra of *S*-TbCl (a) and *S*-EuCl (b) under different temperatures. PL intensities of *S*-TbCl (c) peaked at 550 nm and *S*-EuCl (d) peaked at 612 nm at various temperatures.

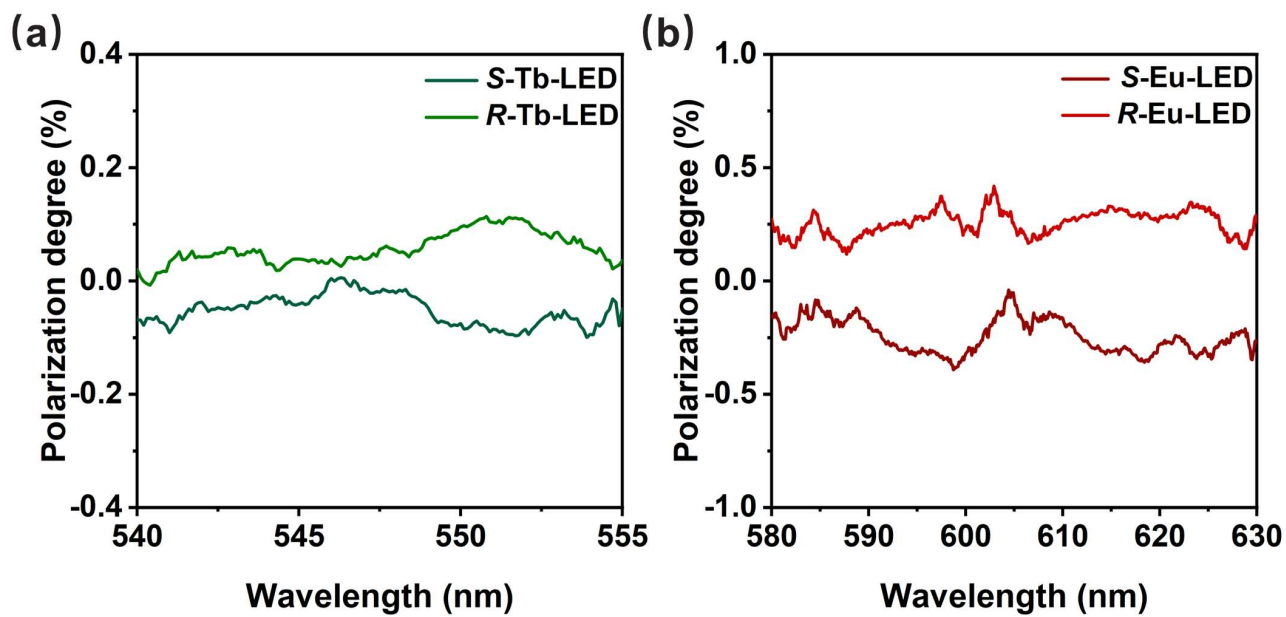

Fig. S17. Polarization degree curves of the CP-LEDs prepared by *S/R*-TbCl (a) and *S/R*-EuCl (b).

## Reference:

- 1 O. V. Dolomanov, L. J. Bourhis, R. J. Gildea, J. A. K. Howard and H. Puschmann, *J. Appl. Crystallogr.*, 2009, **42**, 339-341.
- 2 G. Sheldrick, *Acta Crystallographica Section A*, 2015, **71**, 3-8.
- 3 A. Linden, *Acta Crystallographica Section C*, 2015, **71**, 1-2.
- 4 K. Momma and F. Izumi, *J. Appl. Crystallogr.*, 2011, **44**, 1272-1276.
- 5 M. Lee, H. Chung, S. V. Hong, H. Y. Woo, J.-Y. Chae, T. Y. Yoon, B. T. Diroll and T. Paik, *Nanoscale*, 2023, **15**, 1513-1521.
- 6 Z. Li, R. Núñez, M. E. Light, E. Ruiz, F. Teixidor, C. Viñas, D. Ruiz-Molina, C. Roscini and J. G. Planas, *Chem. Mater.*, 2022, **34**, 4795-4808.
- 7 S. Petoud, G. Muller, E. G. Moore, J. Xu, J. Sokolnicki, J. P. Riehl, U. N. Le, S. M. Cohen and K. N. Raymond, *J. Am. Chem. Soc.*, 2007, **129**, 77-83.
- 8 Y. B. Tan, Y. Okayasu, S. Katao, Y. Nishikawa, F. Asanoma, M. Yamada, J. Yuasa and T. Kawai, *J. Am. Chem. Soc.*, 2020, **142**, 17653-17661.
- 9 A. Zheng, T. Zhao, C. Xiao, X. Jin and P. Duan, *J. Mater. Chem. C*, 2022, **10**, 13084-13092.
- 10 M. Tsurui, R. Takizawa, Y. Kitagawa, M. Wang, M. Kobayashi, T. Taketsugu and Y. Hasegawa, *Angew. Chem. Int. Ed.*, 2024, **63**, e202405584.
- 11 J. Jin, M. C. Folgueras, M. Gao, S. Yu, S. Louisia, Y. Zhang, L. N. Quan, C. Chen, R. Zhang, F. Seeler, K. Schierle-Arndt and P. Yang, *Nano Lett.*, 2021, **21**, 5415-5421.
